# Supplementary material for: Sustained Endurance Training Leads to Metabolomic Adaptation
Source: MDPI journal article supplement (doi:10.3390/metabo12070658), 2022-07-16
Supplement: s1 [file s1]

**Figure S1**

**A**

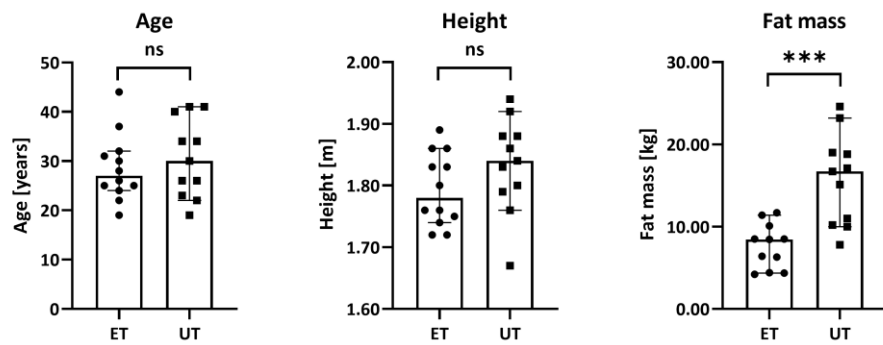

**B**

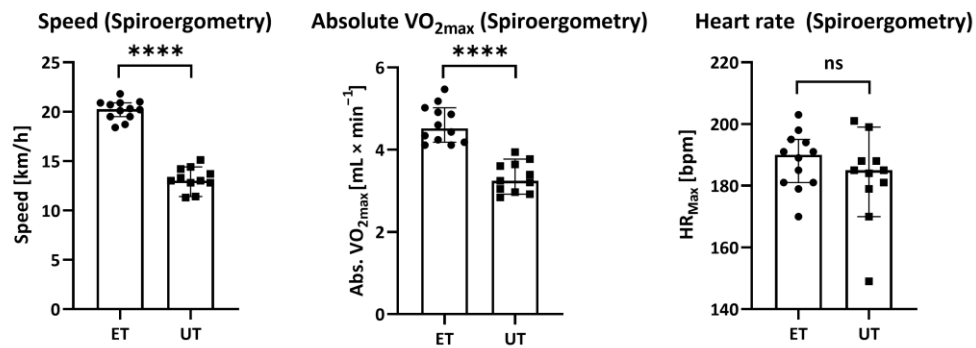

**Figure S1.** Additional participants' details. **(A)** Physiological parameters, i.e. age, height and fat mass, for all volunteers that were grouped into ET ( $n = 12$ ) or UT ( $n = 11$ ). **(B)** Data further describing the speed, absolute  $VO_{2max}$  as well as the heart rate during spiroergometry for all participants. Data have been statistically analyzed by an unpaired, non-parametric, two-tailed  $t$ -test (Mann–Whitney test). \*\*\*:  $p \leq 0.001$ ; \*\*\*\*:  $p \leq 0.0001$ .
